# Supplementary material
Source: publisher figshare collection journal article supplement (https://gsajournals.figshare.com/ndownloader/files/33082703)
Supplement: Supplementary file 1 [file 33082703]

## Sheet: SNF.tmp3
Table S11 SNF genes identified in JD17, WM82, ZH13 and W05
Gene_name	JD17	WM82	ZH13	W05
GmACP	JD009G0233800,JD018G0230900	Glyma.09G248500,Glyma.18G244300	SoyZH13_09G225200,SoyZH13_18G216100	rna-XM_028359879,rna-XM_028391935
GmARF8a_GmARF8b	JD002G0227900,JD014G0210800	Glyma.02G239600,Glyma.14G208500	SoyZH13_02G219500,SoyZH13_14G191600	rna-XM_028344772,rna-XM_028359715
GmBCH1_GmBCH2,Gs52,LjLNP	JD010G0225300,JD020G0157500,JD016G0002000,JD016G0044000	Glyma.20G162600,Glyma.10G231200,Glyma.16G043300	SoyZH13_10G213300,SoyZH13_20G148900,SoyZH13_16G039600	rna-XM_028327365,rna-XM_028364081,rna-XM_028352100
GmBEHL1	JD001G0176800,JD011G0061400	Glyma.11G064300,Glyma.01G178000	SoyZH13_01G161500,SoyZH13_11G062800	rna-XM_028334137,rna-XM_028386668
GmbHLHm1	JD013G0231400	Glyma.13G253500	SoyZH13_13G230800	rna-XM_028332361.1
GmENOD93		Glyma.06G247600	SoyZH13_06G228201,SoyZH13_16G087301,SoyZH13_18G165901
GmEXPB2	JD010G0121900	Glyma.10G122300		rna-XM_028328179.1
GmFWL1	JD009G0177500	Glyma.09G187000		rna-XM_028392314.1
GmGα	JD004G0053100,JD014G0096500,JD017G0224100	Glyma.04G056600,Glyma.14G098000,Glyma.17G226700	SoyZH13_04G054000,SoyZH13_17G215700	rna-XM_028345547,rna-XM_028355718,rna-XM_028372054
GmGβ1_GmGβ2_GmGβ3_GmGβ4	JD004G0011900,JD006G0011400,JD011G0114000,JD012G0040100	Glyma.06G013000,Glyma.11G118500,Glyma.12G043900,Glyma.04G013100	SoyZH13_04G012200,SoyZH13_06G011800,SoyZH13_11G115300,SoyZH13_12G040700	rna-XM_028334610,rna-XM_028338657,rna-XM_028371519,rna-XM_028378767
GmIFS1_GmIFS2,MtFNSII	JD007G0197300,JD013G0156000,JD013G0156100	Glyma.13G173401,Glyma.07G202300,Glyma.13G173500	SoyZH13_07G187900,SoyZH13_13G154803,SoyZH13_13G155300	rna-XM_028332021,rna-XM_028332131,rna-XM_028385310
GmINS1	JD002G0079900,JD007G0166000	Glyma.02G086200,Glyma.07G172000	SoyZH13_02G080800,SoyZH13_07G159300	rna-XM_028344394,rna-XM_028384948
GmmiR160	JD011G0248300	Glyma.11G242700	SoyZH13_11G240400	rna-XM_028341291.1
GmmiR167		Glyma.10G030400,Glyma.02G143900
GmmiR172c		Glyma.11G195600	SoyZH13_11G166802
GmNMNa	JD001G0238700	Glyma.01G241900	SoyZH13_01G223400	rna-XM_028368516.1
GmNNC1	JD011G0140000,JD012G0066800	Glyma.11G149825,Glyma.12G073300	SoyZH13_11G141800,SoyZH13_12G067200	rna-XM_028333947,rna-XM_028338810
GmPT5	JD003G0149000,JD019G0152000	Glyma.19G164300,Glyma.03G162800	SoyZH13_03G145800,SoyZH13_19G148900	rna-XM_028361463,rna-XM_028369781
GmPT7	JD010G0184700,JD020G0197500	Glyma.20G204000,Glyma.10G186500	SoyZH13_10G171400,SoyZH13_20G189200	rna-XM_028326546,rna-XM_028365418
GmRGS1,GmRGS2	JD011G0251200,JD018G0010200	Glyma.11G245800,Glyma.18G011400	SoyZH13_18G010202	rna-XM_028340227,rna-XM_028358240
GmRj2_GmRFG1		Glyma.16G212300	SoyZH13_16G188500	rna-XM_028349877,rna-XM_028349881,rna-XM_028350802
GmUPS1	JD001G0056400,JD002G0108900	Glyma.02G116300,Glyma.01G058500	SoyZH13_01G055600,SoyZH13_02G109100	rna-XM_028347473.1
LjAMSH	JD007G0088600,JD009G0173400	Glyma.09G183100,Glyma.07G093100	SoyZH13_09G164800	rna-XM_028384056,rna-XM_028391607
LjAMT1.1	JD010G0132100,JD020G0083000	Glyma.20G082450,Glyma.10G132300	SoyZH13_10G122500,SoyZH13_20G073500	rna-XM_028328729,rna-XM_028365968
LjAPN1	JD008G0155500	Glyma.08G166200	SoyZH13_08G158800	rna-XM_028391367.1
LjARPC1	JD008G0294800,JD010G0211500,JD018G0093300	Glyma.08G311700,Glyma.18G103800,Glyma.10G216300	SoyZH13_10G199400	rna-XM_028327002,rna-XM_028358545,rna-XM_028390122
LjBRUSH	JD009G0160800,JD016G0186800	Glyma.16G218000,Glyma.09G168500	SoyZH13_09G151300,SoyZH13_16G193200	rna-XM_028325953,rna-XM_028350730
LjBZF	JD008G0285900,JD018G0104800	Glyma.08G302500,Glyma.18G117100	SoyZH13_08G285400,SoyZH13_18G105800	rna-XM_028356459,rna-XM_028390007
LjCASTOR,MtDMI1(LjPOLLUX)	JD012G0157800,JD016G0006700	Glyma.16G003300,Glyma.12G167300	SoyZH13_12G148700,SoyZH13_16G002700	rna-XM_028338234,rna-XM_028351622
LjCCaMK(GOF),MtCCaMK(LOF)	JD008G0212700,JD015G0219800	Glyma.08G227200,Glyma.15G222300	SoyZH13_08G215600,SoyZH13_15G208700	rna-XM_028346757,rna-XM_028389387
LjCCD7	JD001G0073900,JD011G0144800	Glyma.11G161947,Glyma.01G073200	SoyZH13_11G146600	rna-XM_028333002,rna-XM_028377033
LjCHIT5	JD014G0110600,JD017G0213700	Glyma.14G110700,Glyma.17G217000	SoyZH13_14G105300	rna-XM_028352742.1
LjCIP73	JD017G0102400	Glyma.17G106000	SoyZH13_17G102300	rna-XM_028353796.1
LjCKX3	JD009G0060800,JD015G0163200	Glyma.15G170300,Glyma.09G063900		rna-XM_028324035,rna-XM_028347438
LjCLC1	JD001G0178300,JD002G0217400,JD002G0245800,JD011G0060000,JD018G0023900	Glyma.01G179300,Glyma.02G228400,Glyma.11G062900,Glyma.11G231100,Glyma.14G195400,Glyma.18G026000,Glyma.02G258200,Glyma.14G058300	SoyZH13_01G162900,SoyZH13_02G208900,SoyZH13_02G237400,SoyZH13_11G061600,SoyZH13_11G228800,SoyZH13_14G052900,SoyZH13_14G179200,SoyZH13_18G024500	rna-XM_028335080,rna-XM_028341568,rna-XM_028342859,rna-XM_028344815,rna-XM_028358324,rna-XM_028358825,rna-XM_028361398,rna-XM_028386865
LjCLE-RS1	JD013G0339200	Glyma.13G368300	SoyZH13_13G339800	rna-XM_028331100.1
LjCLE-RS2	JD006G0254900,JD012G0113900	Glyma.06G284100	SoyZH13_06G257803
LjCLV2	JD009G0236900,JD018G0227600	Glyma.18G240800,Glyma.09G251800	SoyZH13_09G228200,SoyZH13_18G212900	rna-XM_028356791,rna-XM_028392500
LjCRE1(GOF),MtCRE1(LOF)	JD005G0234100,JD008G0046600	Glyma.08G049000,Glyma.05G241600	SoyZH13_05G226900,SoyZH13_08G046600	rna-XM_028378204,rna-XM_028387087
LjCYCLOPS(MtIPD3)	JD001G0148600,JD009G0203600	Glyma.09G213700,Glyma.01G149500	SoyZH13_01G132800,SoyZH13_09G193800	rna-XM_028383666,rna-XM_028392590
LjEIN2b	JD010G0055700,JD013G0126600	Glyma.10G058300,Glyma.13G145100	SoyZH13_10G055200,SoyZH13_13G125900	rna-XM_028328580,rna-XM_028341341
LjENOD40-1_ENOD40-2		Glyma.01G028500	SoyZH13_01G028402
LjEPR3	JD008G0268100	Glyma.08G283300	SoyZH13_08G267100	rna-XM_028391542.1
LjERF1	JD020G0197200	Glyma.20G203700	SoyZH13_20G188900
LjGLB1	JD011G0117400	Glyma.11G121800	SoyZH13_11G118600	rna-XM_028333013.1
LjGLE1	JD011G0249700	Glyma.11G244100	SoyZH13_11G241800	rna-XM_028341053.1
LjHAR1	JD012G0036300	Glyma.12G040000,Glyma.11G114100	SoyZH13_12G036800,SoyZH13_11G111300	rna-XM_028338795,rna-XM_028334130
LjHIP		Glyma.05G051600		rna-XM_028375869.1
LjIGN1	JD010G0282200,JD020G0232500	Glyma.10G291900,Glyma.20G241200	SoyZH13_10G269500,SoyZH13_20G224800	rna-XM_028327090,rna-XM_028364240
LjIPT3	JD010G0025800	Glyma.10G025300	SoyZH13_10G024900	rna-XM_028328148.1
LjKLV	JD008G0230100,JD018G0253200	Glyma.08G246100,Glyma.18G267000,Glyma.13G056200	SoyZH13_08G232900,SoyZH13_18G237000,SoyZH13_13G043000	rna-XM_028357678,rna-XM_028389202,rna-XM_028341170
LjLAN	JD004G0113300,JD009G0204700	Glyma.09G214900,Glyma.04G123300	SoyZH13_04G110300,SoyZH13_09G195100	rna-XM_028372859,rna-XM_028391650
LjLSK1	JD003G0015500,JD007G0073600	Glyma.03G016500,Glyma.07G076700	SoyZH13_03G015200,SoyZH13_07G072100	rna-XM_028368290,rna-XM_028383850
LjMATE1	JD009G0099000,JD015G0266500	Glyma.15G274600,Glyma.09G102800		rna-XM_028346596,rna-XM_028392751
LjMPK6	JD002G0127900,JD007G0200900	Glyma.02G138800,Glyma.07G206200	SoyZH13_07G191800	rna-XM_028349943,rna-XM_028385348
LjNAP1	JD020G0018600	Glyma.20G019300	SoyZH13_20G018500	rna-XM_028366848.1
LjNENA	JD013G0139500,JD001G0222000,JD011G0017200	Glyma.13G155800,Glyma.01G224700,Glyma.11G018300	SoyZH13_01G206800,SoyZH13_11G017600	rna-XM_028333438,rna-XM_028331674,rna-XM_028392254
LjNFR1_MtLYK3	JD002G0257500	Glyma.02G270800		rna-XM_028362808.1
LjNFR5	JD011G0060200	Glyma.11G063100	SoyZH13_01G162600,SoyZH13_11G061800	rna-XM_028336270,rna-XM_028386851
LjNFRe	JD020G0053500,JD002G0257400	Glyma.20G054500,Glyma.02G270700	SoyZH13_20G049300,SoyZH13_02G248700	rna-XM_028366019,rna-XM_028362796
LjNiCK4	JD006G0215300,JD012G0148400	Glyma.06G230800,Glyma.12G160500	SoyZH13_06G213900,SoyZH13_12G141600	rna-XM_028339617,rna-XM_028381808
LjNIN	JD004G0000600	Glyma.04G000600	SoyZH13_04G001000	rna-XM_028371380.1
LjNPF8.6	JD011G0202200,JD018G0061900	Glyma.11G176800,Glyma.18G064900	SoyZH13_11G197700	rna-XM_028331335,rna-XM_028358323
LjNPL	JD011G0250400,JD018G0010900	Glyma.11G244900,Glyma.18G012200,Glyma.18G012267,Glyma.18G012333,Glyma.11G244800	SoyZH13_11G242600,SoyZH13_18G011000,SoyZH13_11G242500	rna-XM_028340286,rna-XM_028357086,rna-XM_028341342,rna-XM_028357861
LjNRSYM1	JD010G0228100,JD020G0155000	Glyma.10G234100,Glyma.20G160200	SoyZH13_10G216100	rna-XM_028327038,rna-XM_028365181
LjnsRING	JD005G0230300,JD007G0140800,JD008G0042800	Glyma.08G044700,Glyma.05G237500	SoyZH13_05G222900,SoyZH13_08G042900	rna-XM_028378153,rna-XM_028387047
LjNUP133,LjNUP85	JD002G0291000,JD014G0008600	Glyma.02G305200,Glyma.14G008200	SoyZH13_02G281800,SoyZH13_14G008300	rna-XM_028343854,rna-XM_028366556
LjPHYB	JD009G0034300,JD015G0134500	Glyma.09G035500,Glyma.15G140000	SoyZH13_09G033900,SoyZH13_15G135400	rna-XM_028324451,rna-XM_028349322
LjPIR	JD003G0235000,JD019G0236700	Glyma.19G250600,Glyma.03G253000	SoyZH13_03G231700,SoyZH13_19G235102	rna-XM_028363187,rna-XM_028370987
LjRINRK1	JD006G0172200	Glyma.06G184400	SoyZH13_06G175500	rna-XM_028381337.1
LjROP6	JD001G0163100,JD002G0043800,JD004G0021900,JD006G0021100,JD011G0075400,JD011G0103700,JD012G0031400,JD016G0117600	Glyma.01G164200,Glyma.04G023300,Glyma.04G023400,Glyma.06G023300,Glyma.11G079100,Glyma.11G107700,Glyma.12G032700,Glyma.16G124400,Glyma.02G046100	SoyZH13_01G147500,SoyZH13_02G044000,SoyZH13_04G022101,SoyZH13_06G021700,SoyZH13_11G076900,SoyZH13_11G104700,SoyZH13_16G110400	rna-XM_028333985,rna-XM_028334396,rna-XM_028338498,rna-XM_028349491,rna-XM_028371654,rna-XM_028371655,rna-XM_028378881,rna-XM_028385393
LjSCARN	JD007G0256100,JD017G0011600	Glyma.07G262000,Glyma.17G012100	SoyZH13_07G246100,SoyZH13_17G012000	rna-XM_028355120,rna-XM_028386072
LjSEN1	JD005G0119500,JD005G0119600,JD008G0072200,JD008G0072300	Glyma.05G121500,Glyma.05G121600,Glyma.08G076300	SoyZH13_05G110900,SoyZH13_05G111000,SoyZH13_08G072502,SoyZH13_08G072503	rna-XM_028376553,rna-XM_028376554,rna-XM_028388095,rna-XM_028391348
LjSIE3	JD001G0095300,JD008G0257600	Glyma.08G273300,Glyma.01G097700	SoyZH13_01G087200,SoyZH13_08G258600	rna-XM_028379089,rna-XM_028389618
LjSIP1	JD004G0012900,JD006G0012300	Glyma.04G014100,Glyma.06G013900	SoyZH13_04G013200,SoyZH13_06G012700	rna-XM_028371531,rna-XM_028378778
LjSIP2	JD007G0003100,JD008G0209000	Glyma.08G223400,Glyma.07G003200	SoyZH13_07G002900	rna-XM_028382932,rna-XM_028388937
LjSUNER1	JD010G0047300,JD013G0118400	Glyma.10G048300,Glyma.13G136100	SoyZH13_10G046700,SoyZH13_13G117300	rna-XM_028330029,rna-XM_028339734
LjSUS1_LjSUS3,MtSUCS1	JD009G0071200,JD013G0096400,JD015G0173800,JD017G0044800	Glyma.09G073600,Glyma.13G114000,Glyma.15G182600,Glyma.17G045800	SoyZH13_09G070100,SoyZH13_13G095400,SoyZH13_15G173700,SoyZH13_17G044200	rna-XM_028324926,rna-XM_028339921,rna-XM_028347793,rna-XM_028355901
LjSYMRK	JD001G0019900,JD009G0193000	Glyma.01G020100,Glyma.09G202300	SoyZH13_01G020302,SoyZH13_09G183400	rna-XM_028326238,rna-XM_028372306
LjSYP71	JD003G0165600,JD010G0049900,JD013G0121000,JD019G0167500	Glyma.03G179500,Glyma.13G138900,Glyma.19G180200,Glyma.10G051400	SoyZH13_10G049500	rna-XM_028326345,rna-XM_028339894,rna-XM_028360186,rna-XM_028370026
LjTCO	JD003G0189900,JD019G0192100	Glyma.19G203400,Glyma.03G205900	SoyZH13_03G186000,SoyZH13_19G190600	rna-XM_028361525,rna-XM_028370352
LjTML(MtTML1)	JD016G0056100,JD019G0084900	Glyma.19G090600,Glyma.16G057300	SoyZH13_16G053000,SoyZH13_19G079100	rna-XM_028349819,rna-XM_028361145
MsNADH-GOGAT	JD004G0225300,JD006G0119500,JD014G0165400,JD019G0062300	Glyma.04G236900,Glyma.14G162300,Glyma.19G065600,Glyma.06G127400	SoyZH13_04G213100,SoyZH13_06G122600,SoyZH13_14G150200,SoyZH13_19G060300	rna-XM_028344117,rna-XM_028362432,rna-XM_028374202,rna-XM_028380288
MtARF16a	JD010G0206800	Glyma.10G210600	SoyZH13_10G194000	rna-XM_028329716.1
MtARP3	JD005G0170600,JD008G0123100	Glyma.05G172600	SoyZH13_05G161200,SoyZH13_08G124600,SoyZH13_08G124801	rna-XM_028377221,rna-XM_028387902,rna-XM_028387903
MtBG2	JD014G0122800,JD017G0197900	Glyma.14G130300,Glyma.17G202900	SoyZH13_17G191800	rna-XM_028343276,rna-XM_028354420
MtBHLH1	JD004G0091800	Glyma.04G098400	SoyZH13_04G091800	rna-XM_028372643.1
MtBHLH476	JD001G0196700	Glyma.01G198100	SoyZH13_01G181700	rna-XM_028389247.1
MtBRI1	JD004G0208200	Glyma.04G218300,Glyma.06G147600	SoyZH13_06G141800	rna-XM_028373932,rna-XM_028380567
MtCAS31		Glyma.09G185500	SoyZH13_09G167200	rna-XM_028326094.1
MtCBS1	JD009G0124600	Glyma.09G129700		rna-XM_028325647.1
MtCBS1	JD016G0158100	Glyma.16G177500	SoyZH13_16G158000	rna-XM_028349645.1
MtCDC16	JD006G0213300,JD012G0144600	Glyma.12G156300,Glyma.06G228700	SoyZH13_12G138000	rna-XM_028339299,rna-XM_028381784
MtCDPK1	JD001G0165000,JD011G0073600	Glyma.01G166100,Glyma.11G077300	SoyZH13_01G149700,SoyZH13_11G075000	rna-XM_028334279,rna-XM_028385608
MtCHR	JD002G0293000,JD014G0006000	Glyma.14G005700,Glyma.02G307300	SoyZH13_02G283600,SoyZH13_14G005800	rna-XM_028345136,rna-XM_028366811
MtCHS	JD019G0097900	Glyma.19G105100	SoyZH13_19G091600	rna-XM_028363044.1
MtCNGC15a	JD010G0051900,JD013G0122800	Glyma.10G053900,Glyma.13G141000	SoyZH13_10G051500,SoyZH13_13G121700	rna-XM_028327510,rna-XM_028340379
MtCNGC15c	JD012G0165100,JD013G0296900	Glyma.13G324600,Glyma.12G175000	SoyZH13_12G156100,SoyZH13_13G297600	rna-XM_028332914,rna-XM_028337844
MtCOPT1	JD007G0133500,JD018G0179300	Glyma.07G141200,Glyma.18G191300	SoyZH13_07G132101,SoyZH13_18G166200	rna-XM_028357786,rna-XM_028382843
MtCP6	JD011G0169100	Glyma.06G278000,Glyma.06G278200,Glyma.06G279100,Glyma.06G279200,Glyma.06G279900,Glyma.06G283000,Glyma.06G283100,Glyma.11G144900,Glyma.12G077202,Glyma.12G123500,Glyma.12G123600,Glyma.12G127300,Glyma.12G208200,Glyma.15G225000,Glyma.U044800,Glyma.U045200,Glyma.12G127200	SoyZH13_06G255100	rna-XM_028333642,rna-XM_028336523,rna-XM_028337377,rna-XM_028337391,rna-XM_028337400,rna-XM_028338151,rna-XM_028338227,rna-XM_028338229,rna-XM_028338315,rna-XM_028382215,rna-XM_028382218,rna-XM_028382219
MtCPK3	JD008G0298500,JD018G0084900	Glyma.18G096500,Glyma.08G316500	SoyZH13_08G298600,SoyZH13_18G087600	rna-XM_028358295,rna-XM_028390169
MtCRA2	JD004G0082900,JD006G0083900	Glyma.04G088700,Glyma.06G090700	SoyZH13_04G083500,SoyZH13_06G085300	rna-XM_028372511,rna-XM_028379792
MtCRN	JD008G0242500,JD018G0266300	Glyma.08G257700,Glyma.18G282100		rna-XM_028356187,rna-XM_028389350
MtCYP15a	JD014G0217700,JD017G0251800	Glyma.14G216300,Glyma.17G254900		rna-XM_028342841,rna-XM_028355527
MtDELLA1	JD011G0222500,JD018G0037900	Glyma.11G216500,Glyma.18G040000	SoyZH13_11G214900,SoyZH13_18G039400	rna-XM_028340010,rna-XM_028356957
MtDELLA2	JD005G0138700,JD008G0090700	Glyma.05G140400,Glyma.08G095800	SoyZH13_05G129500,SoyZH13_08G090800	rna-XM_028376791,rna-XM_028387543
MtDELLA3	JD020G0194300,JD010G0188300,JD004G0141800,JD006G0198400	Glyma.20G200500,Glyma.10G190200,Glyma.04G150500,Glyma.06G213100	SoyZH13_10G175100,SoyZH13_04G132300,SoyZH13_06G200000	rna-XM_028366287,rna-XM_028329878,rna-XM_028373097,rna-XM_028381669
MtDGD1	JD003G0186300,JD019G0188800	Glyma.03G202100,Glyma.19G200000	SoyZH13_19G187200	rna-XM_028361231,rna-XM_028370304
MtDME	JD020G0181900	Glyma.20G188300	SoyZH13_20G173800	rna-XM_028366222.1
MtDNF2	JD002G0095800	Glyma.02G102700		rna-XM_028346127.1
MtEFD	JD007G0024600,JD008G0202900	Glyma.07G025800,Glyma.08G216600	SoyZH13_08G206400	rna-XM_028367399,rna-XM_028391275
MtERN1	JD016G0041200,JD019G0106000	Glyma.16G040000,Glyma.19G113100	SoyZH13_19G099200	rna-XM_028351094,rna-XM_028361984,rna-XM_028377039
MtERN2	JD002G0067700,JD016G0141900	Glyma.02G072800,Glyma.16G154100	SoyZH13_02G068800,SoyZH13_16G137600	rna-XM_028343334,rna-XM_028350105
MtEXO70H4	JD011G0138000,JD012G0068400	Glyma.11G144600,Glyma.12G075200	SoyZH13_11G139700,SoyZH13_12G069000	rna-XM_028336232,rna-XM_028336745
MtFER3	JD003G0042700	Glyma.03G050100		rna-XM_028368661.1
MtFLOT2,MtFLOT4	JD006G0060500	Glyma.04G064400,Glyma.06G065600	SoyZH13_06G061200	rna-XM_028379410.1
MtGA2ox10	JD012G0028200,JD011G0100800	Glyma.12G029800,Glyma.11G104800	SoyZH13_12G028700,SoyZH13_11G101800	rna-XM_028333624,rna-XM_028336813
MtHMGR1	JD001G0155000,JD011G0084400	Glyma.11G088000,Glyma.01G156700	SoyZH13_01G139600,SoyZH13_11G085800	rna-XM_028330429,rna-XM_028384490
MtKNAT3_MtKNAT5_MtKNAT9_MtKNAT10	JD006G0060200,JD014G0112400,JD013G0140900,JD017G0101300,JD009G0091200,JD015G0195400	Glyma.04G064100,Glyma.06G065200,Glyma.14G112400,Glyma.13G157300,Glyma.17G104800,Glyma.09G095700,Glyma.15G202200	SoyZH13_15G189800	rna-XM_028372158,rna-XM_028379406,rna-XM_028344570,rna-XM_028334123,rna-XM_028354070,rna-XM_028325063,rna-XM_028348047
MtLIN_LjLIN	JD010G0192500,JD012G0164600	Glyma.10G194500	SoyZH13_10G179300	rna-XM_028329692.1
MtLOG1	JD003G0167000,JD010G0051800,JD013G0122700,JD019G0169000	Glyma.10G053800,Glyma.13G140900,Glyma.19G182100,Glyma.03G181300	SoyZH13_03G163500,SoyZH13_10G051400,SoyZH13_13G121600,SoyZH13_19G167100	rna-XM_028327390,rna-XM_028340354,rna-XM_028361806,rna-XM_028370047
MtMMPL	JD002G0027300	Glyma.02G028051,Glyma.02G028100,Glyma.02G028700	SoyZH13_02G027200	rna-XM_028338418.1
MtMOT1.3	JD014G0122600,JD017G0198000,JD017G0198200	Glyma.14G130000	SoyZH13_14G115500,SoyZH13_17G191900,SoyZH13_17G192000	rna-XM_028343316,rna-XM_028353508,rna-XM_028353603
MtMTP2	JD011G0129500,JD012G0054000	Glyma.12G059000,Glyma.11G135500	SoyZH13_11G131300,SoyZH13_12G054300	rna-XM_028331972,rna-XM_028339454
MtN5	JD018G0179600,JD018G0179800	Glyma.18G191600,Glyma.18G191800	SoyZH13_18G166302,SoyZH13_18G166303	rna-XM_028359382.1
MtNAC969	JD001G0049700,JD007G0224000	Glyma.07G229100	SoyZH13_07G214400
MtNAD1	JD018G0269400	Glyma.18G285300,Glyma.02G096200	SoyZH13_02G089500
MtNF-YA1	JD002G0184900	Glyma.02G195000	SoyZH13_02G177601,SoyZH13_12G217905	rna-XM_028355062.1
MtNIP_MtLATD_MtNPF1.7	JD017G0185900	Glyma.17G189300	SoyZH13_17G179200	rna-XM_028353759.1
MtNLP1	JD004G0015900	Glyma.04G017400	SoyZH13_04G016600	rna-XM_028371580.1
MtNOOT	JD002G0178700	Glyma.02G188700	SoyZH13_02G172900	rna-XM_028354518.1
MtNPD1_MtNPD2_MtNPD3_MtNPD4_MtNPD5	JD015G0009000	Glyma.15G008800	SoyZH13_15G008900	rna-XM_028346732.1
MtNSP1	JD007G0038100,JD016G0010700	Glyma.07G039400,Glyma.16G008200	SoyZH13_07G038100,SoyZH13_16G006900	rna-XM_028383399,rna-XM_028350282
MtNSP2	JD006G0103600	Glyma.06G110800	SoyZH13_06G105700	rna-XM_028380049.1
MtPEN3-like	JD007G0014800,JD008G0187900,JD013G0326500,JD015G0018800	Glyma.07G015800,Glyma.08G201300,Glyma.15G019200,Glyma.13G355000	SoyZH13_07G014700,SoyZH13_08G192300,SoyZH13_13G326800,SoyZH13_15G018600	rna-XM_028383094,rna-XM_028388693,rna-XM_028335750,rna-XM_028348589
MtPHO2-like	JD013G0218300,JD015G0071300	Glyma.13G239100,Glyma.15G074200	SoyZH13_13G217400,SoyZH13_15G071800	rna-XM_028334798,rna-XM_028347803
MtPIN2_MtPIN3_MtPIN4	JD007G0159800,JD009G0113300,JD007G0096700,JD009G0166700,JD013G0084900,JD017G0055800	Glyma.07G164600,Glyma.09G117900,Glyma.09G176300,Glyma.07G102500,Glyma.13G101900,Glyma.17G057300	SoyZH13_09G158500,SoyZH13_13G083900	rna-XM_028367411,rna-XM_028392418,rna-XM_028326025,rna-XM_028384145,rna-XM_028340536,rna-XM_028353643
MtPLT1_MtPLT2_MtPLT3_MtPLT4	JD011G0126500,JD012G0051500,JD009G0233500,JD018G0231200,JD001G0022100,JD009G0190500	Glyma.11G131900,Glyma.12G056300,Glyma.18G244600,Glyma.09G248200,Glyma.01G022500,Glyma.09G199800	SoyZH13_18G216400,SoyZH13_01G022600	rna-XM_028332770,rna-XM_028338016,rna-XM_028323965,rna-XM_028357144,rna-XM_028372615,rna-XM_028392414
MtPNO1-like	JD018G0067600,JD018G0067700	Glyma.18G072600,Glyma.18G072700	SoyZH13_18G069700	rna-XM_028359630,rna-XM_028359871,rna-XM_028390427
MtRab7a1_MtRab7a2	JD011G0114300,JD012G0040300,JD007G0004200,JD008G0191600	Glyma.11G118800,Glyma.12G044100,Glyma.07G004500,Glyma.08G205300	SoyZH13_07G004200,SoyZH13_08G196100	rna-XM_028334692,rna-XM_028338739,rna-XM_028382946,rna-XM_028389487
MtRbohA	JD004G0066800,JD006G0067500	Glyma.06G072900,Glyma.04G071600	SoyZH13_04G067700,SoyZH13_06G068400	rna-XM_028372275,rna-XM_028379524
MtRDN1	JD002G0266200	Glyma.02G279600	SoyZH13_02G257500	rna-XM_028363775.1
MtRPG	JD010G0196300	Glyma.10G198700	SoyZH13_10G182900	rna-XM_028328282.1
MtRR5_MtRR9_MtRR11	JD011G0179100	Glyma.11G155100	SoyZH13_11G177500	rna-XM_028332401.1
MtRSD	JD007G0129800	Glyma.07G135800	SoyZH13_07G127001	rna-XM_028382790.1
MtSER6	JD004G0034100,JD006G0033600	Glyma.06G036300,Glyma.04G036200	SoyZH13_04G034200,SoyZH13_06G034600	rna-XM_028371809,rna-XM_028379053
MtSGR	JD001G0212400,JD011G0026100	Glyma.11G027400,Glyma.01G214600	SoyZH13_01G197200,SoyZH13_11G026500	rna-XM_028336188,rna-XM_028391106
MtSPK1	JD013G0076500,JD017G0064600	Glyma.17G066800,Glyma.13G093600	SoyZH13_17G064300	rna-XM_028342430,rna-XM_028354294
MtSymCRK	JD002G0296400,JD014G0001600	Glyma.14G001300,Glyma.02G311200	SoyZH13_02G287100	rna-XM_028344847,rna-XM_028367191
MtSymREM1	JD008G0012400	Glyma.08G012800	SoyZH13_08G012400	rna-XM_028391498.1
MtSYP132	JD012G0184500,JD013G0279900	Glyma.12G194800,Glyma.13G307600	SoyZH13_12G174900,SoyZH13_13G281000	rna-XM_028333851,rna-XM_028338421
MtSYT1_MtSYT2_MtSYT3	JD010G0206100,JD020G0175200,JD011G0103400,JD012G0031100,JD014G0221200,JD017G0255800	Glyma.20G180600,Glyma.10G210000,Glyma.11G107300,Glyma.12G032400,Glyma.14G220000,Glyma.17G259000	SoyZH13_10G193400,SoyZH13_20G166700,SoyZH13_11G104400,SoyZH13_12G031200,SoyZH13_14G202100,SoyZH13_17G246300	rna-XM_028327343,rna-XM_028364265,rna-XM_028333585,rna-XM_028338835,rna-XM_028344688,rna-XM_028354753
MtTIP1g	JD011G0136300,JD012G0060300	Glyma.11G143100	SoyZH13_11G138400,SoyZH13_12G060800	rna-XM_028334972,rna-XM_028336480
MtTML2	JD005G0075300	Glyma.05G077700	SoyZH13_05G075100	rna-XM_028376138.1
MtVAMP721d_MtVAMP721e	JD009G0019300,JD015G0121100,JD007G0217900,JD020G0021500	Glyma.15G126200,Glyma.09G019800,Glyma.07G223000,Glyma.20G022200	SoyZH13_09G019400,SoyZH13_15G121400,SoyZH13_07G208100,SoyZH13_20G021300	rna-XM_028365771,rna-XM_028385592
MtVPE	JD014G0091600,JD017G0227800	Glyma.17G230700,Glyma.14G092800	SoyZH13_14G088300,SoyZH13_17G219400	rna-XM_028343442,rna-XM_028353823
MtZIP6	JD007G0218200,JD020G0021900	Glyma.07G223200,Glyma.20G022500	SoyZH13_07G208300,SoyZH13_20G021700	rna-XM_028366639,rna-XM_028385595
MtZPT2	JD006G0042200	Glyma.06G045400	SoyZH13_06G042400	rna-XM_028379161.1
MtγECS	JD005G0203400,JD008G0013800	Glyma.08G014300,Glyma.05G207600	SoyZH13_05G193800,SoyZH13_08G013800	rna-XM_028377732,rna-XM_028386755
PvAGO5_GmAGO5	JD012G0076200	Glyma.12G083500		rna-XM_028337801.1
PvANN1	JD013G0178500,JD015G0233800	Glyma.U031126,Glyma.13G199800	SoyZH13_13G178100,SoyZH13_15G222100	rna-XM_028334439,rna-XM_028348757
PvBECLIN1	JD004G0131200,JD011G0178000	Glyma.04G141000,Glyma.11G153900	SoyZH13_04G124100,SoyZH13_11G176600	rna-XM_028334639,rna-XM_028373001
PvNF-YC1	JD003G0222000,JD019G0223800	Glyma.19G236400,Glyma.03G239400	SoyZH13_03G218600,SoyZH13_19G221900	rna-XM_028362832,rna-XM_028370797
PvPI3K	JD004G0088100,JD006G0089300	Glyma.04G094500,Glyma.06G096300	SoyZH13_04G088700,SoyZH13_06G091200	rna-XM_028372577,rna-XM_028379851
PvPRAT3	JD004G0006800	Glyma.04G007300	SoyZH13_04G007000	rna-XM_028371467.1
PvRabA2	JD011G0129400,JD012G0053900	Glyma.12G058900,Glyma.11G135400	SoyZH13_11G131200,SoyZH13_12G054200	rna-XM_028334857,rna-XM_028339458
PvRACK1	JD005G0236500,JD008G0049000	Glyma.08G051600,Glyma.05G243800	SoyZH13_05G228900,SoyZH13_08G049000	rna-XM_028378240,rna-XM_028387109
PvRbohA	JD003G0219200,JD019G0221300	Glyma.19G233900,Glyma.03G236300	SoyZH13_03G215600,SoyZH13_19G219600	rna-XM_028363039,rna-XM_028370759
PvSIN1	JD007G0260400,JD017G0007400	Glyma.17G007600,Glyma.07G266500	SoyZH13_07G250800	rna-XM_028355547,rna-XM_028386121
PvTOR	JD001G0238300,JD011G0002500	Glyma.11G002600,Glyma.01G241300	SoyZH13_11G002400	rna-XM_028325378,rna-XM_028332399
